# Supplementary material
Source: PubMed Central journal article supplement (PMC2634992)
Supplement: cam0202_0095SD1.pdf [file cam0202_0095SD1.pdf]

## Supplementary Tables of parameter values used in Figures

### Figures 4a,b; 5a-d; 8a,b

|     | $\Theta_{AC}$ | $\Theta_{actin}$ | $\Theta_{CB}$ | $\Theta_{base}$ | $K_{actin}$<br>(unloaded) | $K_{CB}$ | $K_{base}$<br>(unloaded) | $\sigma_{of}$ |
|-----|---------------|------------------|---------------|-----------------|---------------------------|----------|--------------------------|---------------|
| CHO | 0.01          | 1                | 1000          | 10              | 1                         | 0.1      | 10                       | 10            |
| CHO | 0.1           | 1                | 1000          | 0.1             | 1                         | 0.1      | 1                        | 1             |
| CHO | 0.01          | 10               | 1             | 0.1             | 0.1                       | 10       | 10                       | 10            |
| CHO | 0.1           | 100              | 1             | 0.001           | 10                        | 0.1      | 10                       | 10            |
| CHO | 0.001         | 1                | 1000          | 1               | 10                        | 1        | 10                       | 10            |
| 3T3 | 10            | 0.01             | 0.001         | 0.1             | 0.1                       | 10       | 10                       | 100           |
| 3T3 | 100           | 10               | 10            | 0.001           | 1                         | 1        | 10                       | 100           |
| 3T3 | 100           | 0.01             | 0.01          | 0.1             | 1                         | 1        | 1                        | 10            |
| 3T3 | 10            | 100              | 0.001         | 0.001           | 0.1                       | 10       | 0.1                      | 1             |
| 3T3 | 100           | 1                | 0.01          | 0.1             | 1                         | 10       | 1                        | 10            |

### Figure 6, 7a

|     | $\Theta_{AC}$ | $\Theta_{actin}$ | $\Theta_{CB}$ | $\Theta_{base}$ | $K_{actin}$<br>(unloaded) | $K_{CB}$ | $K_{base}$<br>(unloaded) | $\sigma_{of}$ |
|-----|---------------|------------------|---------------|-----------------|---------------------------|----------|--------------------------|---------------|
| CHO | 0.01          | 1                | 1             | 1               | 10                        | 1        | 10                       | 1             |
| CHO | 0.01          | 1                | 10            | 1               | 1                         | 1        | 1                        | 1             |
| CHO | 0.01          | 1                | 100           | 1               | 1                         | 1        | 1                        | 1             |
| CHO | 0.001         | 1000             | 10            | 10              | 0.1                       | 1        | 10                       | 10            |
| CHO | 0.1           | 1000             | 1000          | 1               | 10                        | 10       | 1                        | 10            |
| CHO | 0.01          | 1000             | 1             | 0.001           | 10                        | 1        | 1                        | 1             |
| CHO | 0.01          | 100              | 1000          | 0.001           | 10                        | 10       | 1                        | 1             |
| CHO | 0.001         | 1000             | 100           | 10              | 1                         | 0.1      | 1                        | 1             |
| CHO | 0.01          | 1000             | 100           | 100             | 0.1                       | 10       | 10                       | 10            |
| CHO | 0.001         | 1                | 100           | 0.1             | 10                        | 0.1      | 10                       | 100           |

### Figure 3

|       | $\Theta_{AC}$ | $\Theta_{actin}$ | $\Theta_{CB}$ | $\Theta_{base}$ | $K_{actin}$<br>(unloaded) | $K_{CB}$ | $K_{base}$<br>(unloaded) | $\sigma_{of}$ |
|-------|---------------|------------------|---------------|-----------------|---------------------------|----------|--------------------------|---------------|
| black | 1             | 1                | 0.01          | 10              | 10                        | 0.1      | 10                       | 10            |
| black | 0.01          | 1                | 1000          | 10              | 1                         | 0.1      | 10                       | 1             |
| black | 10            | 0.001            | 0.1           | 10              | 0.1                       | 10       | 10                       | 10            |
| black | 100           | 100              | 1             | 10              | 10                        | 10       | 0.1                      | 100           |
| black | 0.001         | 1000             | 100           | 100             | 0.1                       | 10       | 10                       | 1             |
| black | 1             | 1                | 1             | 0.001           | 0.1                       | 1        | 1                        | 100           |
| blue  | 0.01          | 1                | 1000          | 10              | 1                         | 0.1      | 10                       | 1             |
| blue  | 0.1           | 1                | 1000          | 0.1             | 1                         | 0.1      | 1                        | 1             |
| blue  | 0.01          | 10               | 1             | 0.1             | 0.1                       | 10       | 10                       | 10            |
| blue  | 0.01          | 10               | 1000          | 1               | 0.1                       | 10       | 1                        | 10            |
